# Supplementary material for: Mutations in SETD2 and genes affecting histone H3K36 methylation target hemispheric high-grade gliomas
Source: PubMed Central journal article supplement (PMC3631313; doi:10.1007/s00401-013-1095-8), 2013-02-16
Supplement: 401_2013_1095_MOESM1_ESM.pdf [file 401_2013_1095_MOESM1_ESM.pdf]

|            |     |           |     |                                                          |    |                                        |     |    |    |    |         |    |               |    |    |    |    |    |    |    |    |    |    |
|------------|-----|-----------|-----|----------------------------------------------------------|----|----------------------------------------|-----|----|----|----|---------|----|---------------|----|----|----|----|----|----|----|----|----|----|
| GLIOMA 051 | No  | Adult     | 48  | NA                                                       | M  | Oligodendroglioma III                  | III | WT | NA | NA | R132H   | WT | NA            | NA | NA | NA | NA | NA | NA | NA | NA | NA |    |
| GLIOMA 052 | No  | Adult     | 69  | NA                                                       | M  | Oligodendroglioma III                  | III | WT | NA | NA | WT      | WT | NA            | NA | NA | NA | NA | NA | NA | NA | NA | NA | NA |
| GLIOMA 053 | No  | Adult     | 48  | NA                                                       | M  | Oligodendroglioma III                  | III | WT | NA | NA | R132H   | WT | NA            | NA | NA | NA | NA | NA | NA | NA | NA | NA | NA |
| GLIOMA 054 | No  | Adult     | 32  | NA                                                       | M  | Oligodendroglioma III recurrence       | III | WT | NA | NA | R132H   | WT | NA            | NA | NA | NA | NA | NA | NA | NA | NA | NA | NA |
| GLIOMA 055 | No  | Adult     | 44  | NA                                                       | F  | Oligoastrocytoma III                   | III | WT | NA | NA | R132H   | WT | NA            | NA | NA | NA | NA | NA | NA | NA | NA | NA | NA |
| GLIOMA 056 | No  | Adult     | 54  | NA                                                       | F  | Oligodendroglioma III                  | III | WT | NA | NA | R132H   | WT | NA            | NA | NA | NA | NA | NA | NA | NA | NA | NA | NA |
| GLIOMA 057 | No  | Adult     | 35  | NA                                                       | M  | Oligodendroglioma III                  | III | WT | NA | NA | R132H   | WT | NA            | NA | NA | NA | NA | NA | NA | NA | NA | NA | NA |
| GLIOMA 058 | No  | Adult     | 58  | NA                                                       | M  | Oligodendroglioma III recurrence       | III | WT | NA | NA | R132H   | WT | NA            | NA | NA | NA | NA | NA | NA | NA | NA | NA | NA |
| GLIOMA 059 | No  | Adult     | 81  | NA                                                       | F  | Oligodendroglioma III                  | III | WT | NA | NA | R132H   | WT | NA            | NA | NA | NA | NA | NA | NA | NA | NA | NA | NA |
| GLIOMA 060 | No  | Adult     | 52  | NA                                                       | F  | Oligoastrocytoma III                   | III | WT | NA | NA | NA      | WT | NA            | NA | NA | NA | NA | NA | NA | NA | NA | NA | NA |
| GLIOMA 061 | No  | Adult     | 41  | NA                                                       | F  | Oligodendroglioma III                  | III | WT | NA | NA | R132H   | WT | NA            | NA | NA | NA | NA | NA | NA | NA | NA | NA | NA |
| GLIOMA 062 | No  | Adult     | 58  | NA                                                       | F  | Inular cortex                          | III | WT | NA | NA | WT      | WT | NA            | NA | NA | NA | NA | NA | NA | NA | NA | NA | NA |
| GLIOMA 063 | No  | Adult     | 43  | NA                                                       | M  | Oligodendroglioma III recurrence       | III | WT | NA | NA | R132H   | WT | NA            | NA | NA | NA | NA | NA | NA | NA | NA | NA | NA |
| GLIOMA 064 | No  | Adult     | 41  | NA                                                       | M  | Oligodendroglioma III                  | III | WT | NA | NA | NA      | WT | NA            | NA | NA | NA | NA | NA | NA | NA | NA | NA | NA |
| GLIOMA 065 | No  | Adult     | 52  | NA                                                       | F  | Oligodendroglioma III recurrence       | III | WT | NA | NA | NA      | WT | NA            | NA | NA | NA | NA | NA | NA | NA | NA | NA | NA |
| GLIOMA 066 | No  | Adult     | 39  | NA                                                       | M  | Oligodendroglioma III                  | III | WT | NA | NA | NA      | WT | NA            | NA | NA | NA | NA | NA | NA | NA | NA | NA | NA |
| GLIOMA 067 | Yes | Pediatric | 4   | Frontal lobe                                             | M  | Oligodendroglioma III                  | III | WT | WT | WT | WT      | WT | WT            | WT | WT | WT | WT | WT | WT | WT | WT | WT | WT |
| GLIOMA 068 | Yes | Pediatric | 5   | NA                                                       | M  | Anaplastic astrocytoma                 | III | WT | WT | WT | WT      | WT | WT            | WT | WT | WT | WT | WT | WT | WT | WT | WT | WT |
| GLIOMA 069 | Yes | Pediatric | 5   | Cerebellum                                               | M  | Anaplastic astrocytoma                 | III | WT | WT | WT | WT      | WT | WT            | WT | WT | WT | WT | WT | WT | WT | WT | WT | WT |
| GLIOMA 070 | Yes | Pediatric | 13  | Pituitary region                                         | F  | Anaplastic astrocytoma                 | III | WT | WT | WT | WT      | WT | WT            | WT | WT | WT | WT | WT | WT | WT | WT | WT | WT |
| GLIOMA 071 | Yes | Pediatric | 14  | Temporal lobe                                            | M  | Anaplastic astrocytoma                 | III | WT | WT | WT | Y183C S | WT | WT            | WT | WT | WT | WT | WT | WT | WT | WT | WT | WT |
| GLIOMA 072 | Yes | Pediatric | 17  | Temporo-parietal lobe                                    | F  | Anaplastic astrocytoma                 | III | WT | WT | WT | WT      | WT | WT            | WT | WT | WT | WT | WT | WT | WT | WT | WT | WT |
| GLIOMA 073 | No  | Adult     | 36  | NA                                                       | M  | Anaplastic astrocytoma                 | III | WT | NA | NA | R132H   | WT | NA            | NA | NA | NA | NA | NA | NA | NA | NA | NA | NA |
| GLIOMA 074 | No  | Adult     | 37  | NA                                                       | M  | Anaplastic astrocytoma                 | III | WT | NA | NA | WT      | WT | NA            | NA | NA | NA | NA | NA | NA | NA | NA | NA | NA |
| GLIOMA 075 | No  | Adult     | 46  | NA                                                       | F  | Oligoastrocytoma III                   | III | WT | NA | NA | WT      | WT | NA            | NA | NA | NA | NA | NA | NA | NA | NA | NA | NA |
| GLIOMA 076 | No  | Adult     | 60  | NA                                                       | F  | Anaplastic astrocytoma                 | III | WT | NA | NA | WT      | WT | NA            | NA | NA | NA | NA | NA | NA | NA | NA | NA | NA |
| GLIOMA 077 | Yes | Pediatric | 9.6 | Posterior fossa                                          | F  | Anaplastic astrocytoma                 | III | WT | WT | WT | WT      | WT | SETD3, p.N31S | WT | WT | WT | WT | WT | WT | WT | WT | WT | WT |
| GLIOMA 078 | No  | Pediatric | 5   | Parietal lobe                                            | M  | Astrocytoma II                         | II  | WT | NA | NA | NA      | WT | NA            | NA | NA | NA | NA | NA | NA | NA | NA | NA | NA |
| GLIOMA 079 | No  | Pediatric | 15  | Cerebellum                                               | M  | Astrocytoma II                         | II  | WT | NA | NA | NA      | WT | NA            | NA | NA | NA | NA | NA | NA | NA | NA | NA | NA |
| GLIOMA 080 | No  | Pediatric | 3   | Thalamus                                                 | F  | Astrocytoma II                         | II  | WT | NA | NA | NA      | WT | NA            | NA | NA | NA | NA | NA | NA | NA | NA | NA | NA |
| GLIOMA 081 | No  | Pediatric | 13  | Bilocation frontal lobe and contralateral occipital lobe | M  | Astrocytoma II                         | II  | WT | NA | NA | NA      | WT | NA            | NA | NA | NA | NA | NA | NA | NA | NA | NA | NA |
| GLIOMA 082 | No  | Adult     | 54  | NA                                                       | M  | Astrocytoma II                         | II  | WT | NA | NA | NA      | WT | NA            | NA | NA | NA | NA | NA | NA | NA | NA | NA | NA |
| GLIOMA 083 | No  | Adult     | 45  | NA                                                       | M  | Oligodendroglioma II                   | II  | WT | NA | NA | NA      | WT | NA            | NA | NA | NA | NA | NA | NA | NA | NA | NA | NA |
| GLIOMA 084 | No  | Adult     | 52  | NA                                                       | M  | Oligoastrocytoma II                    | II  | WT | NA | NA | NA      | WT | NA            | NA | NA | NA | NA | NA | NA | NA | NA | NA | NA |
| GLIOMA 085 | No  | Pediatric | 3   | Cerebellum                                               | M  | Oligoastrocytoma II                    | II  | WT | NA | NA | NA      | WT | NA            | NA | NA | NA | NA | NA | NA | NA | NA | NA | NA |
| GLIOMA 086 | No  | Adult     | 60  | NA                                                       | M  | Astrocytoma II                         | II  | WT | NA | NA | NA      | WT | NA            | NA | NA | NA | NA | NA | NA | NA | NA | NA | NA |
| GLIOMA 087 | No  | Pediatric | 15  | Cerebellum                                               | M  | Astrocytoma II                         | II  | WT | NA | NA | NA      | WT | NA            | NA | NA | NA | NA | NA | NA | NA | NA | NA | NA |
| GLIOMA 088 | No  | Pediatric | 9   | Frontal lobe                                             | F  | Astrocytoma II                         | II  | WT | NA | NA | NA      | WT | NA            | NA | NA | NA | NA | NA | NA | NA | NA | NA | NA |
| GLIOMA 089 | No  | Pediatric | 9   | Temporal lobe                                            | M  | Astrocytoma II                         | II  | WT | NA | NA | NA      | WT | NA            | NA | NA | NA | NA | NA | NA | NA | NA | NA | NA |
| GLIOMA 090 | No  | Pediatric | 15  | Parietal lobe                                            | F  | Astrocytoma II                         | II  | WT | NA | NA | NA      | WT | NA            | NA | NA | NA | NA | NA | NA | NA | NA | NA | NA |
| GLIOMA 091 | No  | Pediatric | 4   | Optic chiasma                                            | F  | Astrocytoma II                         | II  | WT | NA | NA | WT      | WT | NA            | NA | NA | NA | NA | NA | NA | NA | NA | NA | NA |
| GLIOMA 092 | No  | Pediatric | 6.8 | Posterior fossa                                          | F  | Astrocytoma II                         | II  | WT | NA | NA | WT      | WT | NA            | NA | NA | NA | NA | NA | NA | NA | NA | NA | NA |
| GLIOMA 093 | Yes | Pediatric | 12  | Cortex                                                   | F  | Oligodendroglioma/Oligoastrocytoma III | III | WT | WT | WT | Y183C S | WT | WT            | WT | WT | WT | WT | WT | WT | WT | WT | WT | WT |
| GLIOMA 094 | No  | Adult     | 46  | NA                                                       | F  | Astrocytoma II                         | II  | WT | NA | NA | R132H   | WT | NA            | NA | NA | NA | NA | NA | NA | NA | NA | NA | NA |
| GLIOMA 095 | No  | Pediatric | 2   | Cerebellum                                               | M  | Astrocytoma II                         | II  | WT | NA | NA | WT      | WT | NA            | NA | NA | NA | NA | NA | NA | NA | NA | NA | NA |
| GLIOMA 096 | No  | Pediatric | 3   | Cerebellum                                               | M  | Astrocytoma II                         | II  | WT | NA | NA | WT      | WT | NA            | NA | NA | NA | NA | NA | NA | NA | NA | NA | NA |
| GLIOMA 097 | No  | Pediatric | 9   | Temporal lobe                                            | M  | Astrocytoma II                         | II  | WT | NA | NA | WT      | WT | NA            | NA | NA | NA | NA | NA | NA | NA | NA | NA | NA |
| GLIOMA 098 | No  | Pediatric | 18  | Frontal lobe                                             | F  | Astrocytoma II                         | II  | WT | NA | NA | R132C   | WT | NA            | NA | NA | NA | NA | NA | NA | NA | NA | NA | NA |
| GLIOMA 099 | No  | Pediatric | 19  | NA                                                       | F  | Astrocytoma II                         | II  | WT | NA | NA | R132S   | WT | NA            | NA | NA | NA | NA | NA | NA | NA | NA | NA | NA |
| GLIOMA 100 | No  | Adult     | 44  | NA                                                       | M  | Astrocytoma II                         | II  | WT | NA | NA | R132H   | WT | NA            | NA | NA | NA | NA | NA | NA | NA | NA | NA | NA |
| GLIOMA 101 | No  | Adult     | 55  | NA                                                       | M  | Oligoastrocytoma II                    | II  | WT | NA | NA | R132H   | WT | NA            | NA | NA | NA | NA | NA | NA | NA | NA | NA | NA |
| GLIOMA 102 | No  | Pediatric | NA  | Temporal lobe                                            | NA | Astrocytoma II                         | II  | WT | NA | NA | R132H   | WT | NA            | NA | NA | NA | NA | NA | NA | NA | NA | NA | NA |
| GLIOMA 103 | No  | Pediatric | 14  | Cortex                                                   | F  | Glioblastoma                           | IV  | WT | NA | NA | WT      | WT | NA            | NA | NA | NA | NA | NA | NA | NA | NA | NA | NA |
| GLIOMA 104 | No  | Adult     | 22  | Left Frontal Cortex                                      | F  | Astrocytoma II                         | II  | WT | NA | NA | R132H   | WT | NA            | NA | NA | NA | NA | NA | NA | NA | NA | NA | NA |
| GLIOMA 105 | No  | Adult     | 21  | Diencephalon, III ventricle                              | M  | Astrocytoma II                         | II  | WT | NA | NA | WT      | WT | NA            | NA | NA | NA | NA | NA | NA | NA | NA | NA | NA |
| GLIOMA 106 | No  | Adult     | 70  | Left Temporal Cortex                                     | M  | Astrocytoma II                         | II  | WT | NA | NA | WT      | WT | NA            | NA | NA | NA | NA | NA | NA | NA | NA | NA | NA |
| GLIOMA 107 | No  | Adult     | 37  | Right Temporo-parietal Cortex                            | M  | Astrocytoma II                         | II  | WT | NA | NA | R132H   | WT | NA            | NA | NA | NA | NA | NA | NA | NA | NA | NA | NA |
| GLIOMA 108 | No  | Adult     | 74  | Right Parietal Cortex                                    | F  | Astrocytoma II                         | II  | WT | NA | NA | WT      | WT | NA            | NA | NA | NA | NA | NA | NA | NA | NA | NA | NA |
| GLIOMA 109 | No  | Adult     | 50  | Left Temporal Cortex                                     | M  | Astrocytoma II                         | II  | WT | NA | NA | WT      | WT | NA            | NA | NA | NA | NA | NA | NA | NA | NA | NA | NA |
| GLIOMA 110 | No  | Adult     | 54  | Right Temporo-parietal Cortex                            | M  | Astrocytoma II                         | II  | WT | NA | NA | WT      | WT | NA            | NA | NA | NA | NA | NA | NA | NA | NA | NA | NA |
| GLIOMA 111 | No  | Adult     | 39  | Right Parietal Cortex                                    | F  | Astrocytoma II                         | II  | WT | NA | NA | R132H   | WT | NA            | NA | NA | NA | NA | NA | NA | NA | NA | NA | NA |
| GLIOMA 112 | No  | Adult     | 44  | Tectum (lamina quadrigemina)                             | F  | Astrocytoma II                         | II  | WT | NA | NA | WT      | WT | NA            | NA | NA | NA | NA | NA | NA | NA | NA | NA | NA |
| GLIOMA 113 | No  | Adult     | 48  | Left hippocampus                                         | F  | Astrocytoma II                         | II  | WT | NA | NA | WT      | WT | NA            | NA | NA | NA | NA | NA | NA | NA | NA | NA | NA |
| GLIOMA 114 | No  | Adult     | 66  | Left Frontal Cortex                                      | F  | Astrocytoma II                         | II  | WT | NA | NA | WT      | WT | NA            | NA | NA | NA | NA | NA | NA | NA | NA | NA | NA |
| GLIOMA 115 | No  | Adult     | 34  | Left Temporal Cortex                                     | M  | Astrocytoma II                         | II  | WT | NA | NA | R132H   | WT | NA            | NA | NA | NA | NA | NA | NA | NA | NA | NA | NA |
| GLIOMA 116 | No  | Adult     | 29  | Right Frontal Cortex                                     | F  | Astrocytoma II                         | II  | WT | NA | NA | R132H   | WT | NA            | NA | NA | NA | NA | NA | NA | NA | NA | NA | NA |
| GLIOMA 117 | No  | Adult     | 53  | Right Temporal Cortex                                    | M  | Astrocytoma II                         | II  | WT | NA | NA | R132H   | WT | NA            | NA | NA | NA | NA | NA | NA | NA | NA | NA | NA |
| GLIOMA 118 | No  | Pediatric | 2   | Thalamus                                                 | M  | Astrocytoma II                         | II  | WT | NA | NA | WT      | WT | NA            | NA | NA | NA | NA | NA | NA | NA | NA | NA | NA |
| GLIOMA 119 | No  | Pediatric | 4   | Brainstem                                                | M  | Astrocytoma II                         | II  | WT | NA | NA | WT      | WT | NA            | NA | NA | NA | NA | NA | NA | NA | NA | NA | NA |
| GLIOMA 120 | No  | Pediatric | 4   | Cerebellar Hemisphere                                    | F  | Astrocytoma II                         | II  | WT | NA | NA | WT      | WT | NA            | NA | NA | NA | NA | NA | NA | NA | NA | NA | NA |
| GLIOMA 121 | No  | Pediatric | 13  | Brainstem                                                | M  | Astrocytoma II                         | II  | WT | NA | NA | WT      | WT | NA            | NA | NA | NA | NA | NA | NA | NA | NA | NA | NA |
| GLIOMA 122 | No  | Pediatric | 15  | Pituitary Region                                         | F  | Astrocytoma II                         | II  | WT | NA | NA | WT      | WT | NA            | NA | NA | NA | NA | NA | NA | NA | NA | NA | NA |
| GLIOMA 123 | No  | Adult     | 46  | NA                                                       | M  | Oligodendroglioma II                   | II  | WT | NA | NA | R132H   | WT | NA            | NA | NA | NA | NA | NA | NA | NA | NA | NA | NA |
| GLIOMA 124 | No  | Pediatric | 0.4 | Cerebellar Vermis                                        | M  | Astrocytoma II                         | II  | WT | NA | NA | WT      | WT | NA            | NA | NA | NA | NA | NA | NA | NA | NA | NA | NA |

% Homozygous mutations.

S This variant is not predicted to be damaging as it arises in control complex.

# This amino acid substitution is not predicted to be damaging as it is not at a conserved residue.

\* Samples with a private mutation in either ASH1L, SETD3, PBRM1, KDM2B, KDM2A, KDM4A, KDM4B, KDM4C, KDM5C, UTX/KDM6A.

§ Samples demonstrating a private variant that is not highly conserved or with an amino acid change that has been seen in other vertebrates is indicated, but not highlighted within the table. These variants are highlighted as not text when occurring concomitantly with potentially damaging variants.
