# Supplementary material for: Mutations in SETD2 and genes affecting histone H3K36 methylation target hemispheric high-grade gliomas
Source: Springer Nature journal article supplement (doi:10.1007/s00401-013-1095-8), 2013-02-15
Supplement: MOESM2 [file 8404140]

**Table S2: Genes significantly mutated in 60 pediatric high-grade glioma samples**

The number of genes of interest is used in calculating the FDR Q values.

Q values calculated as:  $q = p * \text{numGenes} / \text{rank}$

Number of genes with  $\geq 1$  mutation: 6365

Number of genes of interest: 6365

| Gene         | Raw p value        | All mutations |                  |               |            |               |            |
|--------------|--------------------|---------------|------------------|---------------|------------|---------------|------------|
|              |                    | Rank          | Q value          | #Mutations in | #Affecteds | #Mutations in | #Controls  |
| TP53         | 3.7014E-26         | 1             | 2.356E-22        | 27            | 60         | 4             | 543        |
| H3F3A        | 2.43011E-15        | 2             | 7.734E-12        | 15            | 60         | 1             | 543        |
| ATRX         | 5.67151E-12        | 3             | 1.203E-08        | 15            | 60         | 6             | 543        |
| NF1          | 4.70528E-08        | 4             | 7.487E-05        | 12            | 60         | 9             | 543        |
| <b>SETD2</b> | <b>2.25749E-05</b> | <b>5</b>      | <b>0.0287378</b> | <b>8</b>      | <b>60</b>  | <b>7</b>      | <b>543</b> |
| CSMD3        | 2.96158E-05        | 6             | 0.0314175        | 10            | 60         | 14            | 543        |
| MBL2         | 8.9406E-05         | 7             | 0.0812956        | 4             | 60         | 0             | 543        |
| HSP90B1      | 8.9406E-05         | 7             | 0.0812956        | 4             | 60         | 0             | 543        |
| PITRM1       | 0.00011692         | 9             | 0.0826884        | 6             | 60         | 4             | 543        |
| ASXL1        | 0.000149665        | 10            | 0.0952616        | 5             | 60         | 2             | 543        |
| TRIM60       | 0.000149665        | 10            | 0.0952616        | 5             | 60         | 2             | 543        |
| ATP2B1       | 0.000368577        | 12            | 0.1954995        | 5             | 60         | 3             | 543        |
| TTN          | 0.000368877        | 13            | 0.1806079        | 25            | 60         | 111           | 543        |
| PIK3CA       | 0.000413596        | 14            | 0.1880384        | 4             | 60         | 1             | 543        |
| PRKAG1       | 0.000413596        | 14            | 0.1880384        | 4             | 60         | 1             | 543        |
| CHD7         | 0.000765931        | 16            | 0.3046969        | 5             | 60         | 4             | 543        |
| C18orf32     | 0.000765931        | 16            | 0.3046969        | 5             | 60         | 4             | 543        |
| COL11A2      | 0.000907562        | 18            | 0.3209238        | 7             | 60         | 11            | 543        |
| TUBB2B       | 0.000941116        | 19            | 0.3152737        | 3             | 60         | 0             | 543        |
| CDHR4        | 0.000941116        | 19            | 0.3152737        | 3             | 60         | 0             | 543        |
| ZNF668       | 0.000941116        | 19            | 0.3152737        | 3             | 60         | 0             | 543        |
| NINJ2        | 0.000941116        | 19            | 0.3152737        | 3             | 60         | 0             | 543        |
| LILRB2       | 0.000941116        | 19            | 0.3152737        | 3             | 60         | 0             | 543        |
| PDCL2        | 0.000941116        | 19            | 0.3152737        | 3             | 60         | 0             | 543        |
| RPE65        | 0.000941116        | 19            | 0.3152737        | 3             | 60         | 0             | 543        |
| ENOX1        | 0.000941116        | 19            | 0.3152737        | 3             | 60         | 0             | 543        |
| SUCNR1       | 0.000941116        | 19            | 0.3152737        | 3             | 60         | 0             | 543        |
| HS1BP3       | 0.001148174        | 28            | 0.2610045        | 4             | 60         | 2             | 543        |
| CHPF2        | 0.001148174        | 28            | 0.2610045        | 4             | 60         | 2             | 543        |
| ITGA1        | 0.001148174        | 28            | 0.2610045        | 4             | 60         | 2             | 543        |
| SYNPO2       | 0.001148174        | 28            | 0.2610045        | 4             | 60         | 2             | 543        |
| LIG1         | 0.001414942        | 32            | 0.2814408        | 5             | 60         | 5             | 543        |
| ODZ4         | 0.001836634        | 33            | 0.3542477        | 9             | 60         | 22            | 543        |
| KIAA1244     | 0.001863277        | 34            | 0.3488163        | 6             | 60         | 9             | 543        |
| PRR21        | 0.001863277        | 34            | 0.3488163        | 6             | 60         | 9             | 543        |
| LTBP1        | 0.002396302        | 36            | 0.4236795        | 5             | 60         | 6             | 543        |
| LTF          | 0.002396302        | 36            | 0.4236795        | 5             | 60         | 6             | 543        |
| ZNF697       | 0.002479519        | 38            | 0.4153194        | 4             | 60         | 3             | 543        |
| PLCG2        | 0.002479519        | 38            | 0.4153194        | 4             | 60         | 3             | 543        |
| FBXW7        | 0.002479519        | 38            | 0.4153194        | 4             | 60         | 3             | 543        |
| CDH1         | 0.002479519        | 38            | 0.4153194        | 4             | 60         | 3             | 543        |
| LARP7        | 0.003496245        | 42            | 0.5298475        | 3             | 60         | 1             | 543        |
| RHOBTB1      | 0.003496245        | 42            | 0.5298475        | 3             | 60         | 1             | 543        |
| DNASE2B      | 0.003496245        | 42            | 0.5298475        | 3             | 60         | 1             | 543        |
| HAL          | 0.003496245        | 42            | 0.5298475        | 3             | 60         | 1             | 543        |
| GNL1         | 0.003496245        | 42            | 0.5298475        | 3             | 60         | 1             | 543        |
| LATS1        | 0.003496245        | 42            | 0.5298475        | 3             | 60         | 1             | 543        |
| FGL1         | 0.003496245        | 42            | 0.5298475        | 3             | 60         | 1             | 543        |
| JAK1         | 0.003496245        | 42            | 0.5298475        | 3             | 60         | 1             | 543        |
| HAPLN1       | 0.003496245        | 42            | 0.5298475        | 3             | 60         | 1             | 543        |
| SLC35A5      | 0.003496245        | 42            | 0.5298475        | 3             | 60         | 1             | 543        |
| MARCH3       | 0.003496245        | 42            | 0.5298475        | 3             | 60         | 1             | 543        |
| REPIN1       | 0.003496245        | 42            | 0.5298475        | 3             | 60         | 1             | 543        |
| ACTL7B       | 0.003496245        | 42            | 0.5298475        | 3             | 60         | 1             | 543        |
| C14orf169    | 0.003496245        | 42            | 0.5298475        | 3             | 60         | 1             | 543        |
| GPR15        | 0.003496245        | 42            | 0.5298475        | 3             | 60         | 1             | 543        |

The number of genes of interest is used in calculating the FDR Q values.

Q values calculated as:  $q = p * \text{numGenes} / \text{rank}$

#Genes with  $\geq 1$  TRUNC mutation: 835

Number of genes of interest: 835

| Gene         | Raw p value        | Truncating mutations |                    |               |            |               |            |
|--------------|--------------------|----------------------|--------------------|---------------|------------|---------------|------------|
|              |                    | Rank                 | Q value            | #Mutations in | #Affecteds | #Mutations in | #Controls  |
| NF1          | 2.60584E-10        | 1                    | 2.17587E-07        | 11            | 60         | 2             | 543        |
| TP53         | 4.71267E-10        | 2                    | 1.96754E-07        | 10            | 60         | 1             | 543        |
| ATRX         | 2.36697E-07        | 3                    | 6.58808E-05        | 8             | 60         | 2             | 543        |
| <b>SETD2</b> | <b>8.35849E-06</b> | <b>4</b>             | <b>0.001744835</b> | <b>5</b>      | <b>60</b>  | <b>0</b>      | <b>543</b> |
| AGL          | 0.000413596        | 5                    | 0.069070525        | 4             | 60         | 1             | 543        |
| C3orf32      | 0.008120217        | 6                    | 0.602963765        | 3             | 60         | 2             | 543        |
| OR2A7        | 0.009751905        | 7                    | 0.602963765        | 2             | 60         | 0             | 543        |
| HIP1R        | 0.009751905        | 7                    | 0.602963765        | 2             | 60         | 0             | 543        |
| FAM13B       | 0.009751905        | 7                    | 0.602963765        | 2             | 60         | 0             | 543        |
| DNASE2B      | 0.009751905        | 7                    | 0.602963765        | 2             | 60         | 0             | 543        |
| KIAA1217     | 0.009751905        | 7                    | 0.602963765        | 2             | 60         | 0             | 543        |
| BRAT1        | 0.009751905        | 7                    | 0.602963765        | 2             | 60         | 0             | 543        |
| PLEKHN1      | 0.009751905        | 7                    | 0.602963765        | 2             | 60         | 0             | 543        |
| FRK          | 0.009751905        | 7                    | 0.602963765        | 2             | 60         | 0             | 543        |
| CD1E         | 0.009751905        | 7                    | 0.602963765        | 2             | 60         | 0             | 543        |
| FGL1         | 0.009751905        | 7                    | 0.602963765        | 2             | 60         | 0             | 543        |
| MSH6         | 0.009751905        | 7                    | 0.602963765        | 2             | 60         | 0             | 543        |
| DOCK1        | 0.009751905        | 7                    | 0.602963765        | 2             | 60         | 0             | 543        |
| ALDH16A1     | 0.009751905        | 7                    | 0.602963765        | 2             | 60         | 0             | 543        |
| SYTL2        | 0.009751905        | 7                    | 0.602963765        | 2             | 60         | 0             | 543        |
| FBXW7        | 0.009751905        | 7                    | 0.602963765        | 2             | 60         | 0             | 543        |
| TM4SF1       | 0.009751905        | 7                    | 0.602963765        | 2             | 60         | 0             | 543        |
| REPIN1       | 0.009751905        | 7                    | 0.602963765        | 2             | 60         | 0             | 543        |
| SLCO1B3      | 0.009751905        | 7                    | 0.602963765        | 2             | 60         | 0             | 543        |
| TRIM60       | 0.009751905        | 7                    | 0.602963765        | 2             | 60         | 0             | 543        |
| ZNF343       | 0.009751905        | 7                    | 0.602963765        | 2             | 60         | 0             | 543        |
| BCOR         | 0.009751905        | 7                    | 0.602963765        | 2             | 60         | 0             | 543        |
| LAMA5        | 0.009751905        | 7                    | 0.602963765        | 2             | 60         | 0             | 543        |
| ZEB2         | 0.009751905        | 7                    | 0.602963765        | 2             | 60         | 0             | 543        |
| WDR41        | 0.009751905        | 7                    | 0.602963765        | 2             | 60         | 0             | 543        |
| KRTAP10-1    | 0.009751905        | 7                    | 0.602963765        | 2             | 60         | 0             | 543        |
| PRDM7        | 0.009751905        | 7                    | 0.602963765        | 2             | 60         | 0             | 543        |
| SSPO         | 0.023878862        | 33                   | 0.602963765        | 4             | 60         | 8             | 543        |
| TEX15        | 0.024551818        | 34                   | 0.602963765        | 3             | 60         | 4             | 543        |
| ANO5         | 0.027373484        | 35                   | 0.653053107        | 2             | 60         | 1             | 543        |
| NDRG1        | 0.027373484        | 35                   | 0.653053107        | 2             | 60         | 1             | 543        |
| PRR21        | 0.027373484        | 35                   | 0.653053107        | 2             | 60         | 1             | 543        |
| ARHGEF16     | 0.027373484        | 35                   | 0.653053107        | 2             | 60         | 1             | 543        |
| G6PC2        | 0.027373484        | 35                   | 0.653053107        | 2             | 60         | 1             | 543        |
| RB1          | 0.027373484        | 35                   | 0.653053107        | 2             | 60         | 1             | 543        |
| COL21A1      | 0.027373484        | 35                   | 0.653053107        | 2             | 60         | 1             | 543        |
| TSC2         | 0.027373484        | 35                   | 0.653053107        | 2             | 60         | 1             | 543        |
| ZNF761       | 0.027373484        | 35                   | 0.653053107        | 2             | 60         | 1             | 543        |
| C9orf174     | 0.027373484        | 35                   | 0.653053107        | 2             | 60         | 1             | 543        |
| MGAM         | 0.051250723        | 45                   | 0.95098563         | 2             | 60         | 2             | 543        |
| IQCE         | 0.051250723        | 45                   | 0.95098563         | 2             | 60         | 2             | 543        |
| ZNF560       | 0.051250723        | 45                   | 0.95098563         | 2             | 60         | 2             | 543        |
| FLT3         | 0.051250723        | 45                   | 0.95098563         | 2             | 60         | 2             | 543        |
| ZNF337       | 0.051250723        | 45                   | 0.95098563         | 2             | 60         | 2             | 543        |
| BRCA2        | 0.080004393        | 50                   | 1                  | 2             | 60         | 3             | 543        |
| FBN3         | 0.080004393        | 50                   | 1                  | 2             | 60         | 3             | 543        |
| MYBPC2       | 0.080004393        | 50                   | 1                  | 2             | 60         | 3             | 543        |
